# Supplementary material for: Molecular Components of Nitrogen Fixation Gene Cluster and Associated Enzymatic Activities of Non-Heterocystous Thermophilic Cyanobacterium Thermoleptolyngbya sp.
Source: MDPI journal article supplement (doi:10.3390/life11070640), 2021-06-30
Supplement: s1 [file s1]

# Supplementary Materials:

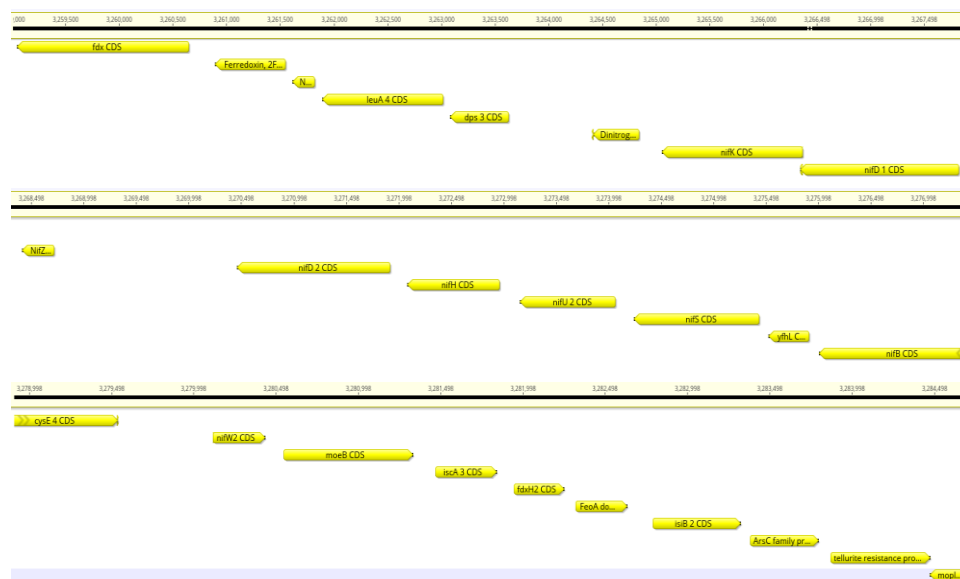

Figure.S1 Gene cluster of strains in this study

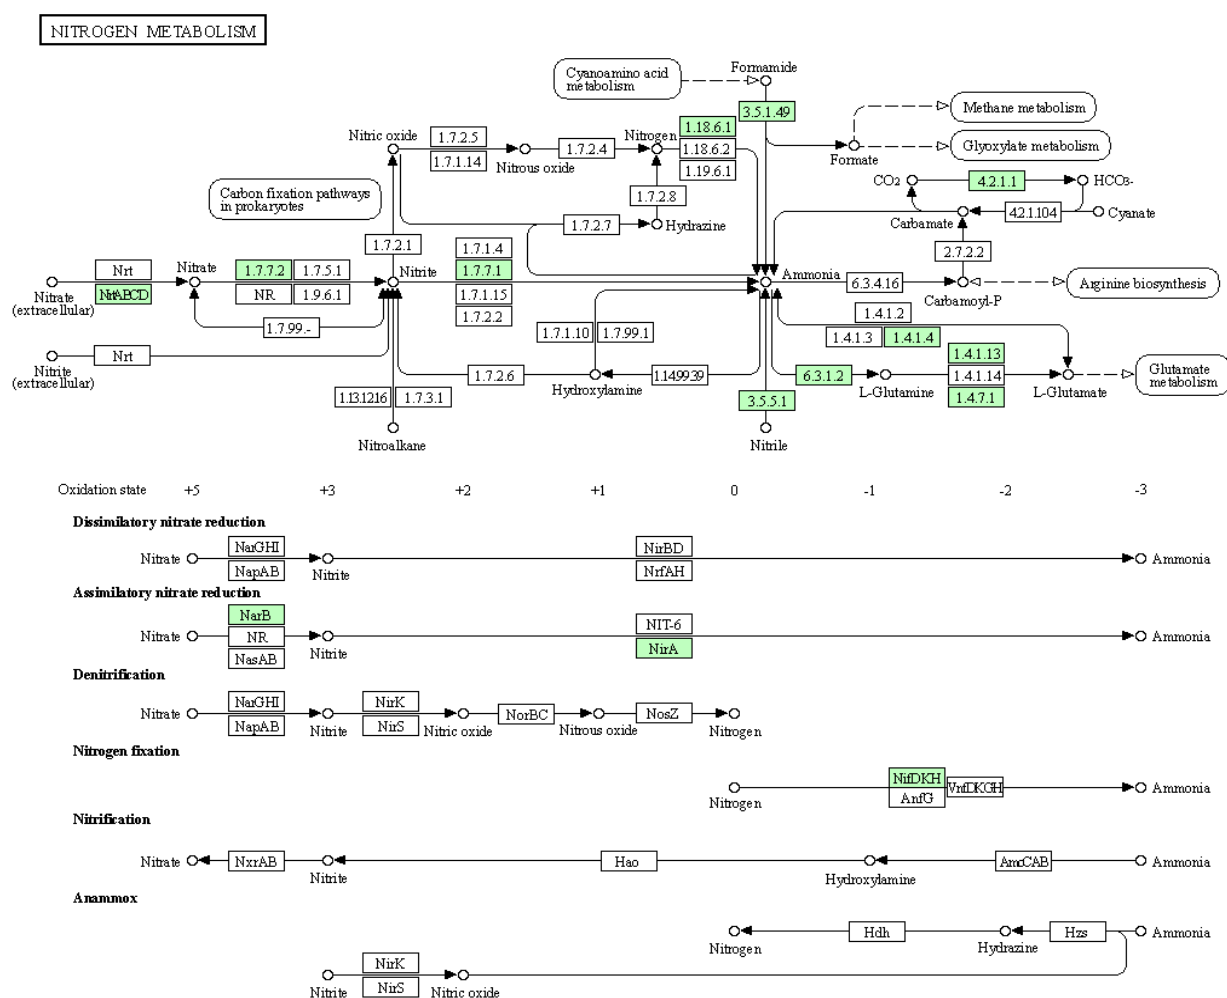

Figure.S2 KEGG pathway of nitrogen metabolism for strain B121

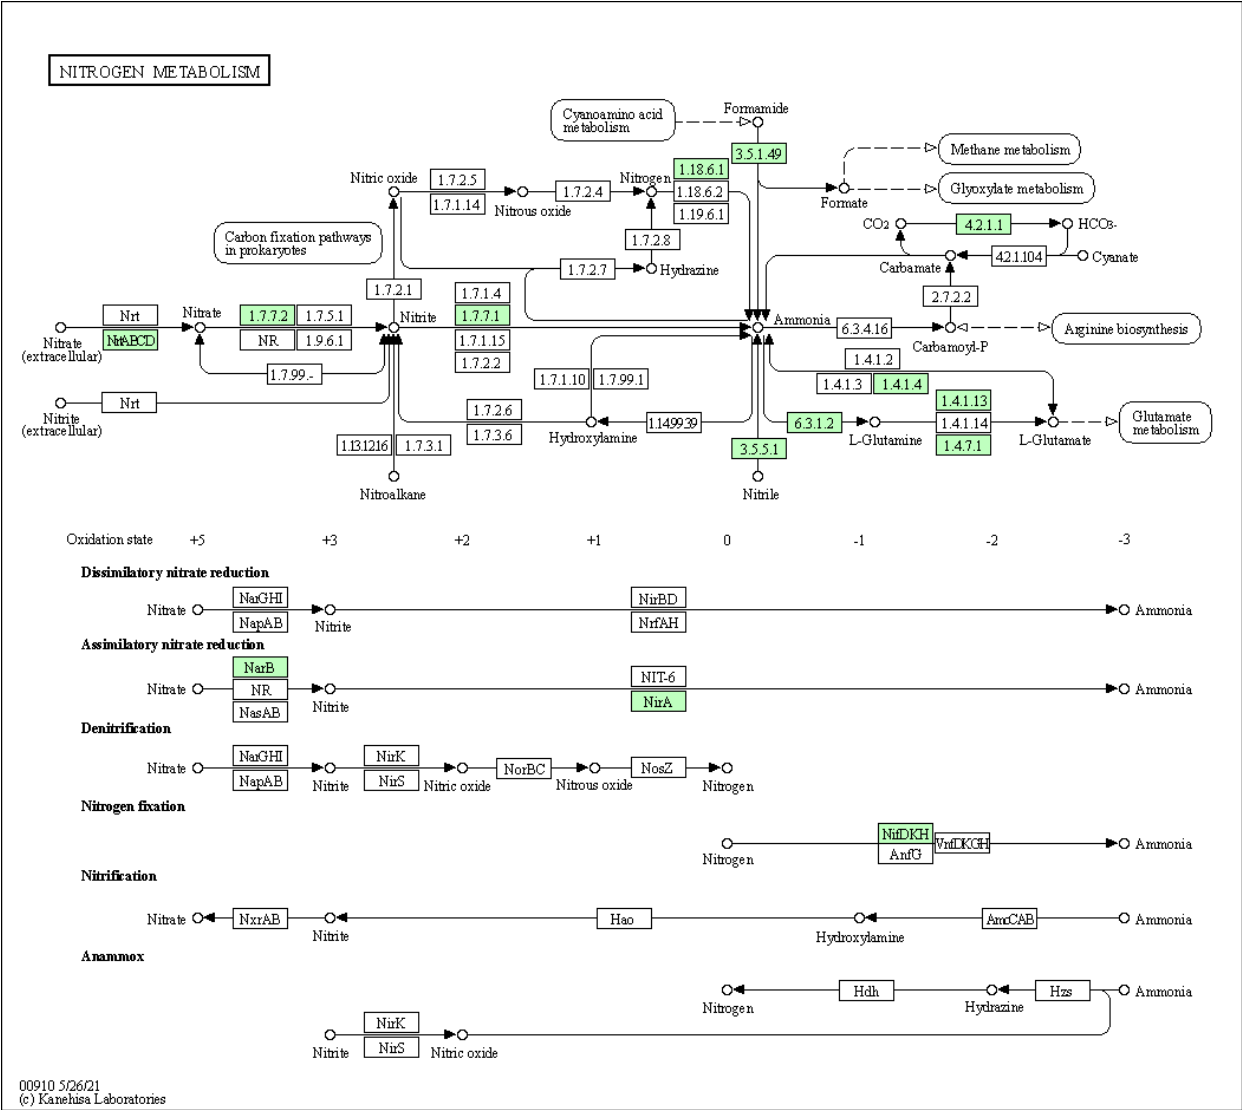

Figure.S3 KEGG pathway of nitrogen metabolism for strain A183

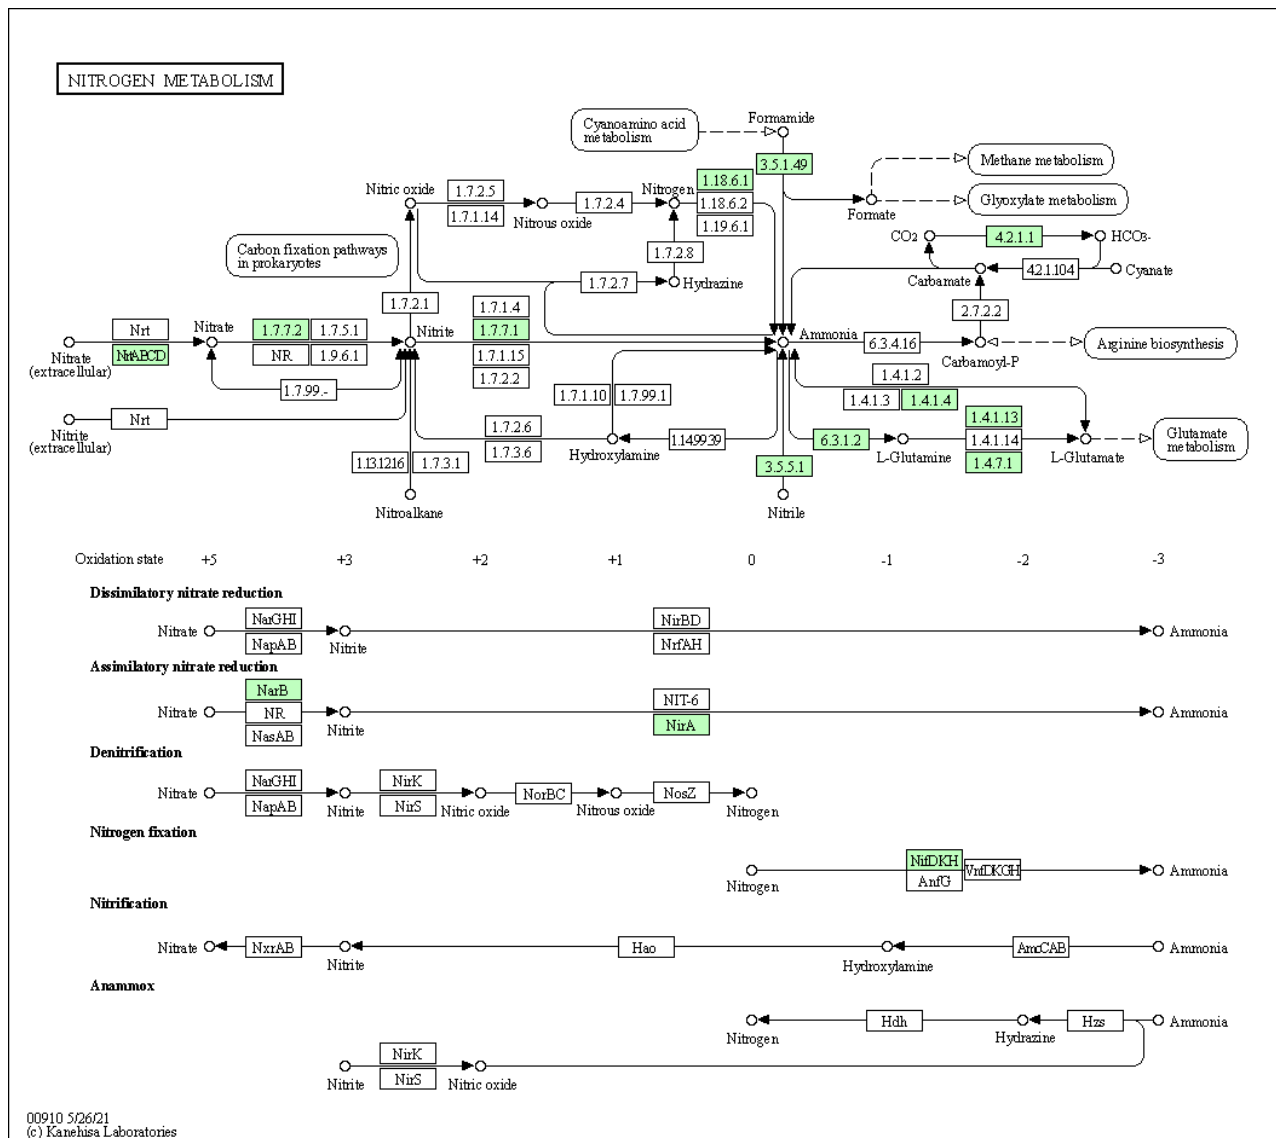

**Figure.S4** KEGG pathway of nitrogen metabolism for strain *Thermoleptolyngbya* sp. O-77

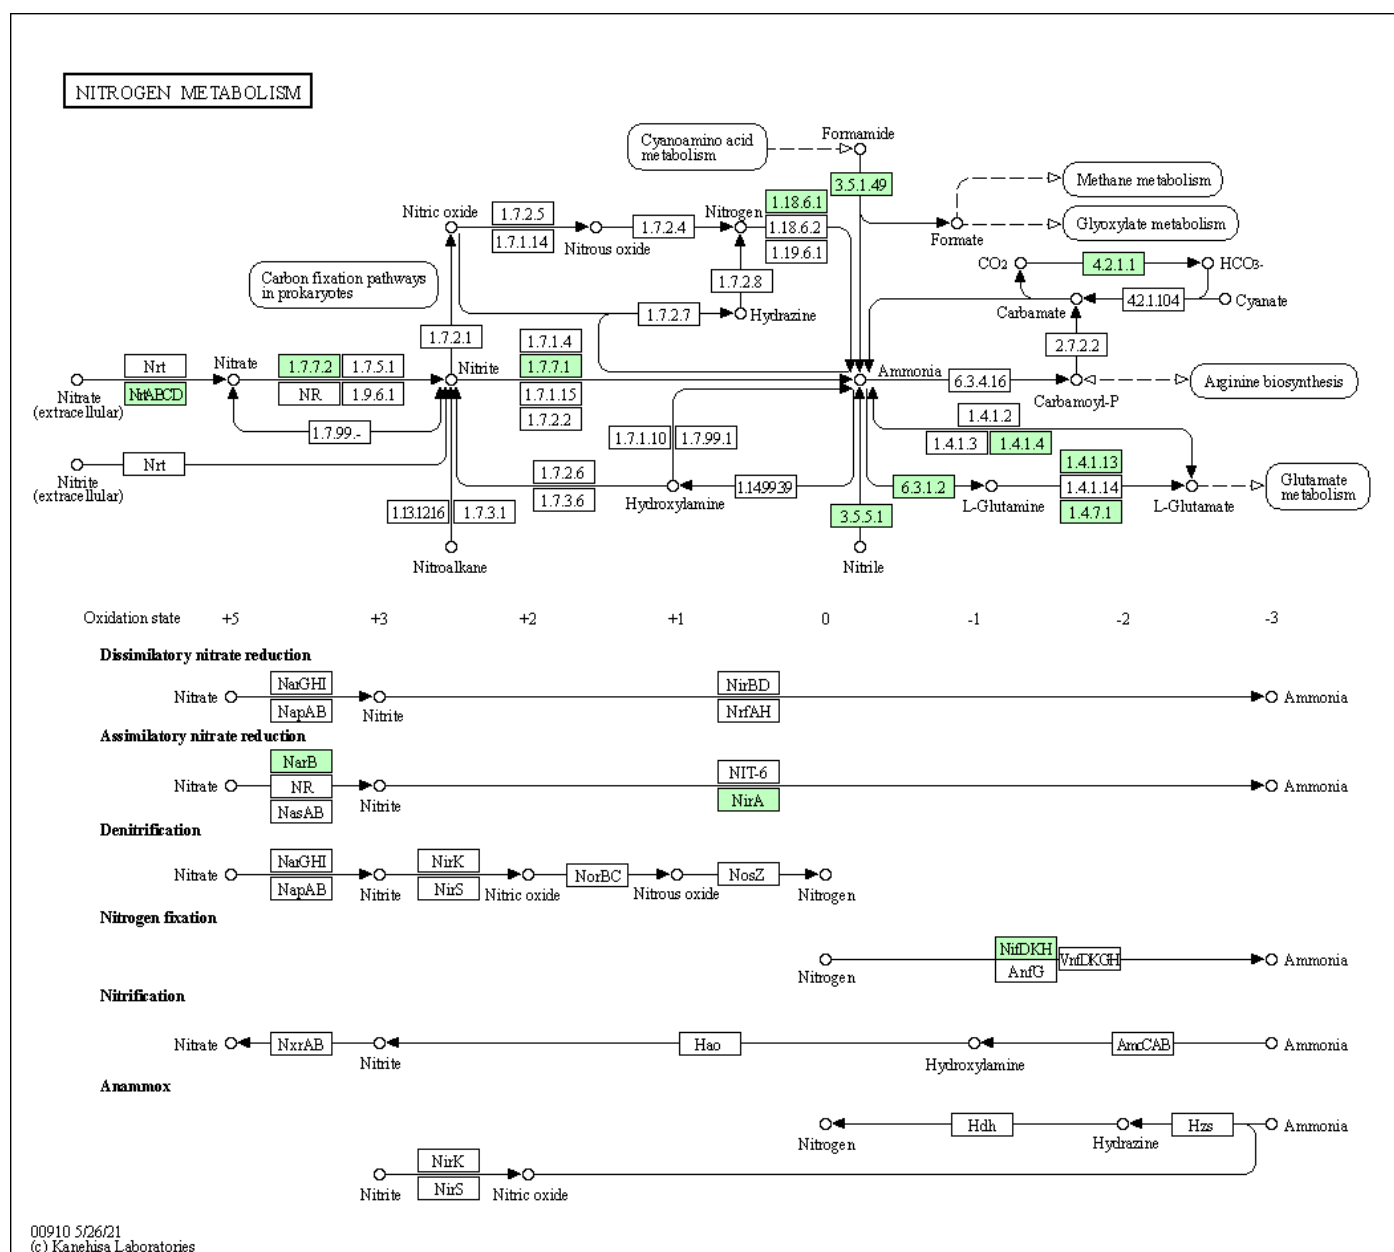

**Figure.S5** KEGG pathway of nitrogen metabolism for strain *Thermoleptolyngbya* sp. C42\_A2020
